# Supplementary material
Source: publisher site journal article supplement (https://www.spandidos-publications.com/7605/downloadSupplementary)
Supplement: Supplementary file 1 [file downloadSupplementary]

## Sheet: Sheet1
Table SV. Kyoto Encyclopedia of Genes and Genomes pathway enrichment analysis of manganese metabolism-related genes in pancreatic ductal adenocarcinoma.
	ID	Description	setSize	enrichmentScore	NES	pvalue	p.adjust	qvalue	rank	leading_edge	core_enrichment
hsa04061	hsa04061	Viral protein interaction with cytokine and cytokine receptor	39	0.682538	1.96941	4.74e-06	0.00123719	0.00110771	415	tags=79%, list=26%, signal=61%	CCL18/IL2RA/CCL20/CCL19/CXCL10/CCL7/CCR3/CXCR3/CXCR4/CCL5/CCL21/LTA/CCL8/CCL3/CXCL8/CXCL3/CCR5/TNF/TNFRSF1B/IL2/CCL4/CXCR2/IL18/CSF1R/IL6/TNFSF10/CXCL6/CCL23/CCR2/CX3CL1/IL10
hsa05323	hsa05323	Rheumatoid arthritis	41	0.654448	1.90162	2.37e-05	0.00309814	0.00277389	393	tags=71%, list=24%, signal=55%	MMP1/CSF2/CCL20/IL1A/HLA-DQB1/MMP3/HLA-DRB1/HLA-DRB5/CTLA4/CD28/CCL5/ITGB2/IFNG/ITGAL/CCL3/CXCL8/IL23A/CXCL3/ACP5/TNF/TNFSF13B/IL18/IL1B/TGFB2/IL6/TLR4/CXCL6/TGFB1/ICAM1
hsa04640	hsa04640	Hematopoietic cell lineage	39	0.631009	1.82073	0.000158375	0.0137786	0.0123366	360	tags=69%, list=22%, signal=55%	CSF2/MS4A1/IL2RA/IL1A/ITGA2/HLA-DQB1/HLA-DRB1/HLA-DRB5/CD55/MME/ITGA4/IL4/CD4/CD38/TNF/ITGAM/ITGA1/CD8A/CD14/GP1BA/IL1B/CD9/ITGA5/CSF1R/IL6/IL7/ITGB3
hsa05321	hsa05321	Inflammatory bowel disease	27	0.680123	1.8612	0.000316937	0.0137868	0.0123439	415	tags=70%, list=26%, signal=53%	IL1A/FOXP3/HLA-DQB1/HLA-DRB1/HLA-DRB5/IFNG/IL4/IL23A/TNF/IL2/IL18/IL1B/TGFB2/MAF/IL6/TLR4/STAT1/TGFB1/IL10
hsa05133	hsa05133	Pertussis	39	0.621014	1.79189	0.000286234	0.0137868	0.0123439	361	tags=59%, list=22%, signal=47%	IL1A/C1QA/ITGB2/C1QC/C1QB/CXCL8/IL23A/NOS2/CFL1/TNF/ITGAM/NLRP3/CD14/IL1B/GNAI2/ITGA5/C1S/MAPK3/IL6/TLR4/CASP1/CXCL6/GNAI1
hsa04060	hsa04060	Cytokine-cytokine receptor interaction	102	0.50324	1.66103	0.00025831	0.0137868	0.0123439	415	tags=53%, list=26%, signal=42%	CCL18/CSF2/CD70/IL1RN/IL2RA/CCL20/IL1A/CCL19/CXCL10/CCL7/CCR3/CXCR3/CXCR4/CD40LG/CCL5/CCL21/CD27/LTA/CCL8/LIF/IFNG/IL4/CCL3/CD4/CXCL8/IL23A/CXCL3/CCR5/FASLG/TNF/TNFSF13B/TNFRSF1B/IL2/CCL4/IFNA1/CXCR2/IL18/IL1B/TGFB2/CSF1R/BMP6/IL6/TNFSF10/IL7/CXCL6/CCL23/TGFB1/BMPR2/ACVR1/CCR2/CX3CL1/TGFBR1/FAS/IL10
hsa04659	hsa04659	Th17 cell differentiation	40	0.614643	1.77794	0.000459662	0.0171388	0.0153451	407	tags=50%, list=25%, signal=38%	IL2RA/FOXP3/HLA-DQB1/HLA-DRB1/HLA-DRB5/LCK/AHR/IFNG/IL4/CD4/IL23A/IL2/IL1B/MAPK3/IL6/HIF1A/STAT1/TGFB1/ZAP70/TGFBR1
hsa05140	hsa05140	Leishmaniasis	38	0.612484	1.75996	0.00067672	0.0218975	0.0196058	373	tags=53%, list=23%, signal=42%	PTGS2/IL1A/HLA-DQB1/HLA-DRB1/HLA-DRB5/ITGA4/ITGB2/IFNG/PRKCB/IL4/NOS2/TNF/ITGAM/IL1B/TGFB2/CYBA/MAPK3/TLR4/STAT1/TGFB1
hsa04514	hsa04514	Cell adhesion molecules	36	0.614344	1.73848	0.000755087	0.0218975	0.0196058	286	tags=53%, list=18%, signal=44%	VCAN/HLA-DQB1/HLA-DRB1/SELL/HLA-DRB5/CTLA4/CDH2/CD28/SELPLG/CD40LG/SPN/ITGA4/ITGB2/PDCD1/ITGAL/CD4/SELP/ITGAM/CD8A
hsa04141	hsa04141	Protein processing in endoplasmic reticulum	33	-0.55957	-1.90779	0.00122358	0.0220765	0.019766	210	tags=30%, list=13%, signal=27%	MAP3K5/MAPK9/ATF4/HSPA8/CRYAA/HSPA1A/P4HB/EIF2AK3/ERN1/XBP1
hsa05144	hsa05144	Malaria	29	0.637621	1.76489	0.00108175	0.0220765	0.019766	498	tags=79%, list=31%, signal=56%	COMP/CD40LG/ITGB2/IFNG/ITGAL/MET/CXCL8/SELP/TNF/LRP1/THBS1/IL18/IL1B/TGFB2/IL6/TLR4/TGFB1/ICAM1/SELE/IL10/ACKR1/VCAM1/HGF
hsa04940	hsa04940	Type I diabetes mellitus	15	0.736149	1.76383	0.00121193	0.0220765	0.019766	297	tags=73%, list=18%, signal=60%	IL1A/HLA-DQB1/HLA-DRB1/HLA-DRB5/CD28/LTA/IFNG/FASLG/TNF/IL2/IL1B
hsa05330	hsa05330	Allograft rejection	13	0.749665	1.73712	0.00097784	0.0220765	0.019766	266	tags=77%, list=16%, signal=65%	HLA-DQB1/HLA-DRB1/HLA-DRB5/CD28/CD40LG/IFNG/IL4/FASLG/TNF/IL2
hsa05332	hsa05332	Graft-versus-host disease	12	0.761957	1.73435	0.00112557	0.0220765	0.019766	328	tags=92%, list=20%, signal=74%	IL1A/HLA-DQB1/HLA-DRB1/HLA-DRB5/CD28/IFNG/FASLG/TNF/IL2/IL1B/IL6
hsa05150	hsa05150	Staphylococcus aureus infection	23	0.643965	1.7182	0.00126877	0.0220765	0.019766	322	tags=70%, list=20%, signal=57%	KRT19/HLA-DQB1/HLA-DRB1/HLA-DRB5/SELPLG/C1QA/ITGB2/C1QC/C1QB/ITGAL/SELP/CFH/FPR1/ITGAM/C5AR1/C1S
hsa04820	hsa04820	Cytoskeleton in muscle cells	40	0.58432	1.69023	0.00178589	0.0291324	0.0260834	360	tags=62%, list=22%, signal=50%	COMP/COL3A1/COL1A2/FN1/VCAN/ITGA2/ITGB6/FLNC/ITGA4/ITGB5/COL4A1/LMNB1/ENO2/MYH14/ATP1A3/ACTB/ITGA1/LMNA/JUP/THBS1/ENO1/ITGA5/ITGA9/SGCB/ITGB3
hsa04658	hsa04658	Th1 and Th2 cell differentiation	30	0.60817	1.70245	0.00215453	0.0330783	0.0296164	383	tags=47%, list=24%, signal=36%	IL2RA/HLA-DQB1/HLA-DRB1/HLA-DRB5/LCK/IFNG/IL4/CD4/IL2/MAF/MAPK3/STAT1/ZAP70/NOTCH3
hsa05322	hsa05322	Systemic lupus erythematosus	16	0.715402	1.74421	0.00247615	0.034358	0.0307621	415	tags=81%, list=26%, signal=61%	HLA-DQB1/HLA-DRB1/HLA-DRB5/CD28/CD40LG/C1QA/IFNG/C1QC/C1QB/TNF/C1S/CTSG/IL10
hsa04657	hsa04657	IL-17 signaling pathway	50	0.547161	1.65272	0.00250116	0.034358	0.0307621	328	tags=34%, list=20%, signal=28%	MMP1/CSF2/MMP9/CCL20/PTGS2/LCN2/CXCL10/MMP3/CCL7/IFNG/IL4/CXCL8/CXCL3/TNF/IL1B/MAPK3/IL6
NES, Normalized Enrichment Score.
